# Supplementary material for: Right atrial and ventricular strain detects subclinical changes in right ventricular function in precapillary pulmonary hypertension
Source: PubMed Central journal article supplement (PMC10509049; doi:10.1007/s10554-022-02555-6), 2022-02-21

# Right atrial strain

# Right ventricular strain

Healthy control

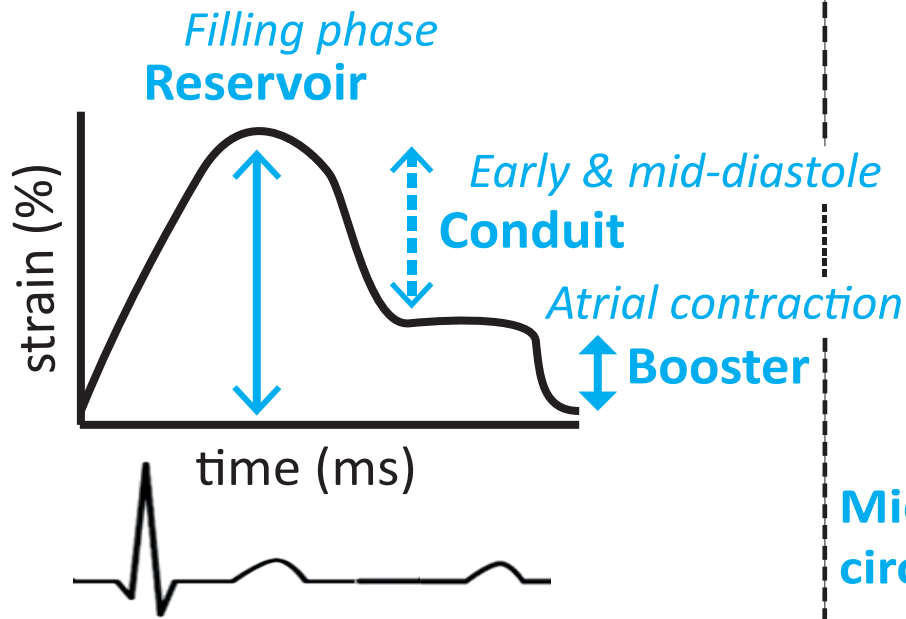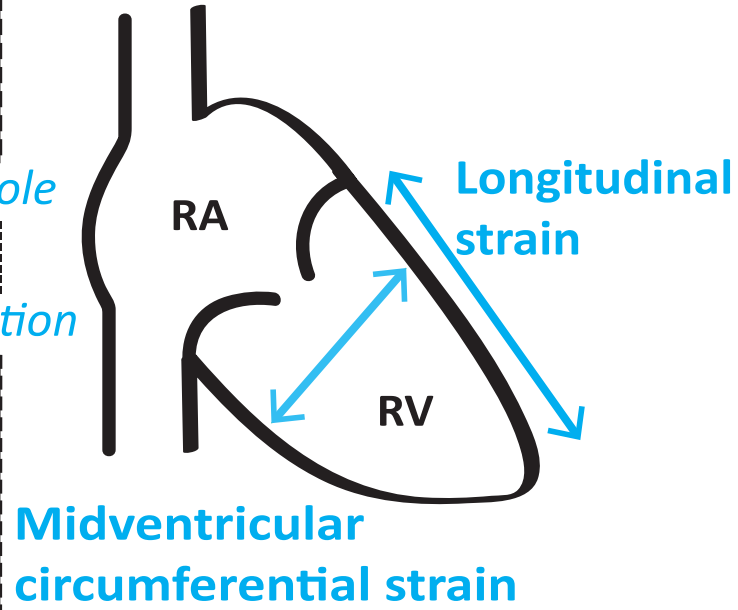

Precapillary PH patients with relatively preserved RVEF (>40%)

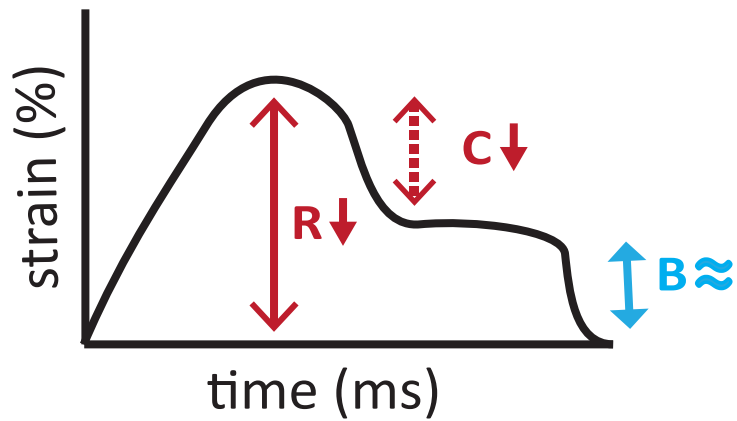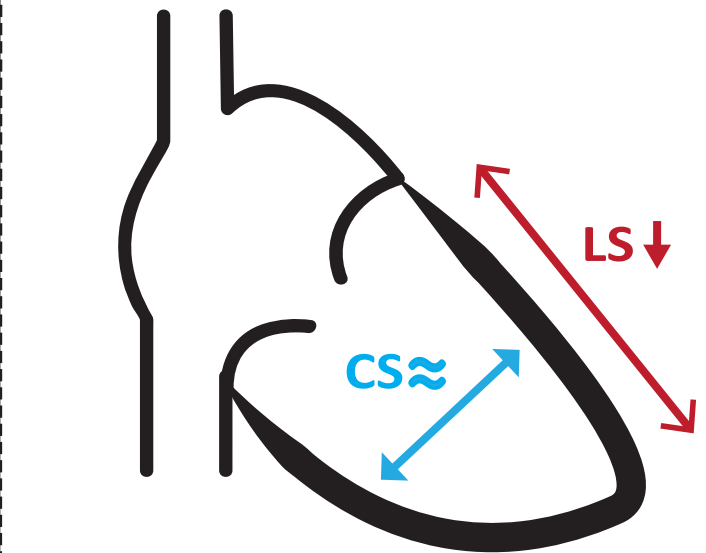

Precapillary PH patients with severely reduced RVEF (<40%)

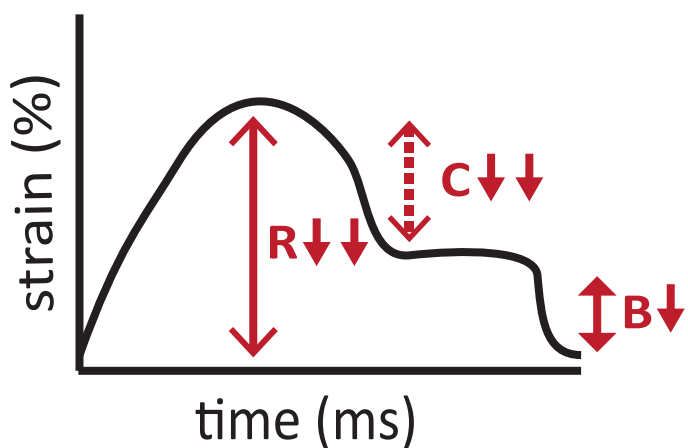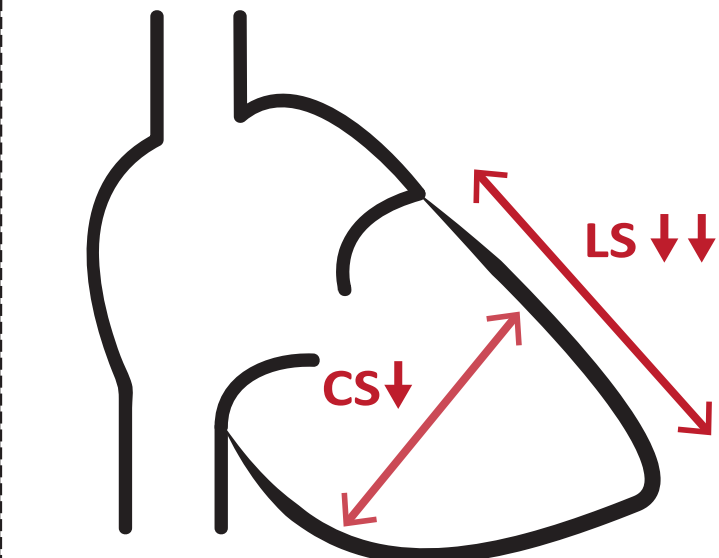

Supplement: 10554_2022_2555_MOESM2_ESM.pdf [file 10554_2022_2555_MOESM2_ESM.pdf]
